# Supplementary material
Source: PubMed Central journal article supplement (PMC6647859)
Supplement: NIHMS1033271-supplement-S1.pdf [file NIHMS1033271-supplement-S1.pdf]

In the format provided by the authors and unedited.

# Distinct phenotype of CD4<sup>+</sup> T cells driving celiac disease identified in multiple autoimmune conditions

Asbjørn Christophersen<sup>1,2,3,4</sup>, Eivind G. Lund <sup>1,2,3,14</sup>, Omri Snir<sup>1,2,3,14</sup>, Elsa Solà<sup>4,5</sup>, Chakravarthi Kanduri<sup>1,6</sup>, Shiva Dahal-Koirala<sup>1,2,3</sup>, Stephanie Zühlke<sup>1,2,3</sup>, Øyvind Molberg<sup>2,7</sup>, Paul J. Utz<sup>4</sup>, Mina Rohani-Pichavant<sup>4</sup>, Julia F. Simard<sup>8</sup>, Cornelia L. Dekker <sup>9</sup>, Knut E. A. Lundin<sup>1,2,10</sup>, Ludvig M. Sollid <sup>1,2,3,11,15\*</sup> and Mark M. Davis <sup>4,12,13,15\*</sup>

<sup>1</sup>KG Jebsen Coeliac Disease Research Centre, University of Oslo, Oslo, Norway. <sup>2</sup>Institute of Clinical Medicine, University of Oslo, Oslo, Norway.

<sup>3</sup>Department of Immunology, University of Oslo, Oslo, Norway. <sup>4</sup>Institute for Immunity, Transplantation and Infection, Stanford University School of Medicine, Stanford, CA, USA. <sup>5</sup>Liver Unit, Hospital Clínic Barcelona, University of Barcelona, IDIBAPS, Barcelona, Spain. <sup>6</sup>Department of Informatics, University of Oslo, Oslo, Norway. <sup>7</sup>Department of Rheumatology, Dermatology and Infectious Diseases, Oslo University Hospital, Oslo, Norway.

<sup>8</sup>Epidemiology, Health Research and Policy, Stanford School of Medicine, Stanford, CA, USA. <sup>9</sup>Department of Pediatrics, Stanford University School of Medicine, Stanford, CA, USA. <sup>10</sup>Department of Gastroenterology, Oslo University Hospital, Oslo, Norway. <sup>11</sup>Department of Immunology, Oslo University Hospital, Oslo, Norway. <sup>12</sup>Department of Microbiology and Immunology, Stanford University School of Medicine, Stanford, CA, USA. <sup>13</sup>The Howard Hughes Medical Institute, Stanford University School of Medicine, Stanford, CA, USA. <sup>14</sup>These authors contributed equally: Eivind G. Lund, Omri Snir.

<sup>15</sup>These authors jointly directed this work: Ludvig M. Sollid, Mark M. Davis. \*e-mail: [l.m.sollid@medisin.uio.no](mailto:l.m.sollid@medisin.uio.no); [mmdavis@stanford.edu](mailto:mmdavis@stanford.edu)

**Supplementary Tale 1. Mass cytometry antibody panel for celiac disease patients.**

| Label       | Target             | Clone     | Supplier          | Concentration |
|-------------|--------------------|-----------|-------------------|---------------|
| 89Y         | CD45               | HI30      | Fluidigm          | 2:100         |
| 108Pd       | CD45               | HI30      | Biologend         | 8 µg/ml       |
| 115In       | CD57* **           | HCD57     | Biologend         | 1.5 µg/ml     |
| 139La       | CD28* **           | CD28.2    | Biologend         | 4 µg/ml       |
| 141Pr       | Intebrin-α4/CD49d* | 9F10      | Fluidigm          | 1:100         |
| 142Nd       | KLRG1* **          | 13F12F2   | Thermo Fischer S. | 3 µg/ml       |
| 143Nd       | CD278/ICOS* **     | C398.4A   | Fluidigm          | 0.5:100       |
| 144Nd       | CD38* **           | HIT2      | Fluidigm          | 1.5:100       |
| 145Nd       | CD4                | RPA-T4    | Fluidigm          | 0.5:100       |
| 146Nd       | CD8a               | RPA-T8    | Fluidigm          | 0.6:100       |
| 147Sm       | CD137 (41BB)*      | 4-1BB     | R&D systems       | 12 µg/ml      |
| 148Nd       | CD27* **           | O323      | Biologend         | 1 µg/ml       |
| 149Sm       | CD56 (NCAM)        | NCAM16.2  | Fluidigm          | 0.5:100       |
| 150Nd       | CD127* **          | A019D5    | Biologend         | 1 µg/ml       |
| 151Eu       | CD11c              | Bu15      | Biologend         | 2 µg/ml       |
| 151Eu       | CD19               | H1B19     | Biologend         | 1 µg/ml       |
| 151Eu       | CD14               | M5E2      | Fluidigm          | 1:100         |
| 152Sm       | CD244*             | 2B4       | R&D systems       | 4 µg/ml       |
| 153Eu       | CD62L* **          | DREG-56   | Fluidigm          | 0.5:100       |
| 154Sm       | CD3                | UCHT1     | Fluidigm          | 0.8:100       |
| 155Gd       | CD279 (PD-1)* **   | EH12.2H7  | Fluidigm          | 1.8:100       |
| 156Gd       | CD195 (CCR5)*      | NP-6G4    | Fluidigm          | 4:100         |
| 158Gd       | CD194 (CCR4)* **   | L291H4    | Fluidigm          | 0.5:100       |
| 159Tb       | CD161* **          | HP-3G10   | Fluidigm          | 0.5:100       |
| 160Gd       | CD39* **           | A1        | Fluidigm          | 1:100         |
| 161Dy       | CD152 (CTLA-4)* ** | 14D3      | Fluidigm          | 5:100         |
| 162Dy       | Integrin-β7*       | F1B504    | Fluidigm          | 0.5:100       |
| 163Dy       | CD183 (CXCR3)* **  | G025H7    | Fluidigm          | 0.75:100      |
| 164Dy       | OX40 (CD134)*      | Ber-ACT35 | Biologend         | 8 µg/ml       |
| 165Ho       | Phycoerythrin      | PE001     | Fluidigm          | 1.25:100      |
| 166Er       | CD85j/ILT2*        | GHI/75    | Fluidigm          | 1:100         |
| 167Er       | CD197 (CCR7)*      | G043H7    | Fluidigm          | 1:100         |
| 168Er       | CD73* **           | AD2       | Fluidigm          | 1:100         |
| 169Tm       | CD25 (IL-2R)* **   | 2A3       | Fluidigm          | 0.6:100       |
| 170Er       | CD45RA* **         | HI100     | Fluidigm          | 0.1:100       |
| 171Yb       | CD185 (CXCR5)* **  | RF8B2     | Fluidigm          | 0.75:100      |
| 172Yb       | CD69* **           | FN50      | Biologend         | 1 µg/ml       |
| 173Yb       | HLA-DR* **         | L243      | Fluidigm          | 0.75:100      |
| 174Yb       | CD196 (CCR6)* **   | G034E3    | Biologend         | 1 µg/ml       |
| 175Lu       | CD184 (CXCR4)*     | 12G5      | Fluidigm          | 1.25:100      |
| 176Yb       | Allophycocyanin    | APC003    | Fluidigm          | 1.25:100      |
| 191Ir/193Ir | Nucleated cells    |           | Fluidigm          | 1:1000        |
| 195Pt       | Dead cells         |           | Fluidigm          | 1:1500        |
| 209Bi       | CD11b*             | ICRF44    | Fluidigm          | 0.4:100       |

**Supplementary Table 1. Mass cytometry antibody panel for celiac disease patients.**

Antibody panel for mass cytometry staining of HLA-DQ2.5:gluten tetramer-stained peripheral blood and single-cell suspensions of gut biopsies from celiac disease patients and controls subjects. The panel includes metal tags for sample barcoding (anti-CD45), secondary staining of phycoerythrin for identification of HLA-DQ2.5:gluten tetramer-binding cells and secondary staining of allophycocyanin for exclusion of non-HLA-DQ:gluten-specific HLA-DQ2.5:CLIP2 tetramer binding in addition to viability staining (195Pt) and nucleated cell staining (191/193Ir). One asterisk identifies markers included in the t-SNE plots in Fig. 1b, 2b, g and Extended Data Fig. 3c, 5c. Final concentrations are stated in  $\mu\text{g}/\text{ml}$  when using self-conjugated antibodies or per volume 100 when the concentration was not available from the manufacturer.

**Supplementary Table 2. Epitopes represented by HLA-DQ2.5 and HLA-DQ8 tetramers.**

| HLA-DQ2.5 epitope       | Peptide sequence with underlined 9-mer core |
|-------------------------|---------------------------------------------|
| DQ2.5-glia- $\alpha$ 1a | QLQ <u>PFPQPEL</u> PY                       |
| DQ2.5-glia- $\alpha$ 2  | <u>PQPELPYPQ</u> PE                         |
| DQ2.5-glia- $\omega$ 1  | QQ <u>PFPQPEQ</u> PFP                       |
| DQ2.5-glia- $\omega$ 2  | <u>FPQPEQFP</u> WQP                         |
| DQ2.5-hor-3             | <u>PIPEQPQ</u> YPQ                          |
| DQ2.5-CLIP2             | MAT <u>PLLMQAL</u> PMGAL                    |
| HLA-DQ8 epitope         |                                             |
| DQ8-glia- $\alpha$ 1a   | SG <u>EGSFQPSQ</u> ENPQ                     |
| DQ2.5-glia- $\gamma$ 1b | <u>FPEQPEQ</u> YPYEQ                        |

**Supplementary Table 2. Epitopes represented by HLA-DQ2.5 and HLA-DQ8 tetramers.** We used soluble biotinylated HLA-DQ2.5 (i.e., *DQA1\*05* and *DQB1\*02*) or HLA-DQ8 (i.e., *DQA1\*03* and *DQB1\*03*) molecules covalently linked with the here listed gluten-derived CD4<sup>+</sup> T-cell epitopes (9-mer core sequence indicated in red).

Supplementary Table 3. Participant list.

| Participant | Category  | Sex     | HLA type       | Marsh Score    | Anti-TG2       | Anti-DGP       | Material  | Method                |
|-------------|-----------|---------|----------------|----------------|----------------|----------------|-----------|-----------------------|
| P1          | UCeD      | F       | DQ2.5          | 3B-C           | 17             | 14             | PBMC, SCS | Mass cytometry        |
| P2          | UCeD      | F       | DQ2.5/DQ2.2    | 3B-C           | 4.1            | 91             | PBMC, SCS | Mass cytometry        |
| P3          | UCeD      | F       | DQ2.5          | 3B-C           | >100           | >100           | PBMC, SCS | Mass cytometry        |
| P4          | UCeD      | F       | DQ2.5          | 3C             | 1              | >100           | PBMC, SCS | Mass cytometry        |
| P5          | UCeD      | F       | DQ2.5          | 3B             | 42             | 59             | PBMC      | Mass cytometry        |
| P6          | UCeD      | M       | DQ2.5          | 3A             | 100            | 37             | PBMC      | Mass cytometry        |
| P7          | UCeD      | M       | DQ2.5          | 3B             | 25             | >100           | PBMC      | Mass cytometry        |
|             |           |         |                |                |                |                | SCS       | Flow cytometry        |
| P8          | UCeD      | M       | DQ2.5          | 3C             | not determined | not determined | PBMC      | Mass cytometry        |
| P9          | UCeD      | F       | DQ2.5          | 3A             | 24.9           | 42             | SCS       | Mass cytometry        |
| P10         | UCeD      | M       | DQ2.5          | 3C             | 128            | not determined | SCS       | Mass cytometry        |
| P11         | UCeD      | F       | DQ2.5          | 3A             | 32             | <5             | SCS       | Mass cytometry        |
| P12         | UCeD      | M       | DQ2.5          | 3b             | >100           | 36             | PBMC      | Flow cytometry        |
| P13         | UCeD      | M       | DQ2.5          | 3C             | >100           | >100           | PBMC, SCS | Flow cytometry        |
| P14         | UCeD      | M       | DQ2.5          | 3B-C           | >100           | 41             | PBMC, SCS | Flow cytometry        |
| P15         | UCeD      | F       | DQ2.5          | 3B             | 2.6            | 13             | PBMC      | Flow cytometry        |
| P16         | UCeD      | F       | DQ2.5          | 3A-B           | 20.8           | 64             | PBMC      | Flow cytometry        |
| P17         | UCeD      | F       | DQ2.5          | 3A             | not determined | not determined | PBMC, SCS | Flow cytometry        |
| P18         | UCeD      | M       | DQ2.5          | 3B-C           | >100           | >100           | SCS       | Flow cytometry        |
| P19         | UCeD      | F       | DQ8            | 3B             | 77             | not determined | SCS       | Flow cytometry        |
| P20         | UCeD      | F       | DQ2.5          | 3B             | 27.3           | >100           | SCS       | RNA Seq               |
| P21         | UCeD      | F       | DQ2.5          | 3C             | >100           | 94             | SCS       | RNA Seq               |
| P22         | UCeD      | F       | DQ2.5          | 3A             | 4.2            | 18             | SCS       | RNA Seq               |
| P23         | UCeD      | F       | DQ2.5          | 3B             | >100           | >100           | SCS       | RNA Seq               |
| P24         | UCeD      | F       | DQ2.5          | 3C             | >100           | >100           | SCS       | RNA Seq               |
| P25         | TCeD      | F       | DQ2.5          | not determined | <1             | <5             | PBMC      | Mass cytometry        |
|             | Challenge | F       | DQ2.5          | not determined | <1             | <5             | PBMC      | Flow & mass cytometry |
| P26         | TCeD      | F       | DQ2.5          | not determined | <1             | <5             | PBMC      | Mass cytometry        |
|             | Challenge | F       | DQ2.5          | not determined | <1             | <5             | PBMC      | Flow & mass cytometry |
| P27         | Challenge | M       | DQ2.5          | not determined | <1             | <5             | PBMC      | Flow cytometry        |
| P28         | Challenge | M       |                | not determined | <1             | <5             | PBMC      | Flow cytometry        |
| P29         | TCeD      | F       | DQ2.5          | not determined | <1             | 7              | PBMC      | Mass cytometry        |
|             | Challenge |         |                |                | 1.1            | 8              |           |                       |
| P30         | TCeD      | F       | DQ2.5          | not determined | <1             | <5             | PBMC      | Mass cytometry        |
|             | Challenge |         |                |                | <1             | <5             |           |                       |
| P31         | TCeD      | F       | DQ2.5          | not determined | not determined | not determined | PBMC      | Mass cytometry        |
|             | Challenge |         |                |                | 1.1            | 6              |           |                       |
| P32         | TCeD      | F       | DQ2.5          | 0              | <1             | <5             | PBMC      | Mass cytometry        |
| P33         | TCeD      | F       | DQ2.5          | 0              | 2.2            | 18             | PBMC, SCS | Mass cytometry        |
| P34         | TCeD      | M       | DQ2.5          | 0              | 2              | <5             | PBMC, SCS | Mass cytometry        |
| P35         | TCeD      | F       | DQ2.5          | 0              | <1             | <5             | PBMC      | Mass cytometry        |
| P36         | TCeD      | F       | DQ2.5          | 0              | 1.1            | 13             | PBMC      | Mass cytometry        |
| P37         | TCeD      | F       | DQ2.5          | 0              | <1             | 13             | PBMC      | Mass cytometry        |
| P38         | TCeD      | F       | DQ2.5          | 3A             | <1             | <5             | PBMC      | Mass cytometry        |
| P39         | TCeD      | M       | DQ2.5          | 1              | <1             | <5             | SCS       | Mass cytometry        |
| P40         | TCeD      | F       | DQ2.5          | 3A             | 2              | 5              | SCS       | Mass cytometry        |
| P41         | TCeD      | F       | DQ2.5          | 0              | <1             | <5             | SCS       | Mass cytometry        |
| P42         | TCeD      | F       | DQ2.5          | 3B             | 42.1           | 80             | SCS       | Mass cytometry        |
| P43         | Control   | F       | DQ2.5          | 0              | <1             | 6              | PBMC, SCS | Mass cytometry        |
| P44         | Control   | F       | DQ2.5          | 0              | <1             | <5             | PBMC, SCS | Mass cytometry        |
| P45         | Control   | F       | DQ2.5          | 0              | not determined | not determined | PBMC, SCS | Mass cytometry        |
| P46         | Control   | M       | DQ2.5          | 0              | <1             | <5             | PBMC,SCS  | Mass cytometry        |
| P47         | Control   | Unknown | not determined | not determined | not determined | not determined | PBMC      | Mass cytometry        |
| P48         | Control   | Unknown | not determined | not determined | not determined | not determined | PBMC      | Mass cytometry        |
| P49         | Control   | Unknown | not determined | not determined | not determined | not determined | PBMC      | Mass cytometry        |
| P50         | Control   | Unknown | not determined | not determined | not determined | not determined | PBMC      | Mass cytometry        |
| P51         | Control   | Unknown | not determined | not determined | not determined | not determined | PBMC      | Mass cytometry        |
| P52         | Control   | Unknown | not determined | not determined | not determined | not determined | PBMC      | Mass cytometry        |
| P53         | Control   | F       | DQ2.5          | 0              | <1             | <5             | SCS       | Mass cytometry        |
| P54         | Control   | F       | DQ2.5          | 0              | <1             | <5             | SCS       | Mass cytometry        |
| P55         | Control   | M       | DQ2.5          | 0              | <1             | 14             | SCS       | Mass cytometry        |
| P56         | Control   | M       | DQ2.5          | 0              | <1             | <5             | SCS       | RNA Seq               |

|     |         |   |       |                |    |    |     |         |
|-----|---------|---|-------|----------------|----|----|-----|---------|
| P57 | Control | M | DQ8   | 0              | <1 | <5 | SCS | RNA Seq |
| P58 | Control | F | DQ2.5 | 0              | <1 | <5 | SCS | RNA Seq |
| P59 | Control | F | DQ8   | not determined | <1 | <5 | SCS | RNA Seq |

**Supplementary Table 3. Participant list.** Untreated and treated celiac disease (UCeD and TCeD, respectively) patients and controls (for participants with other autoimmune diseases, influenza infection and controls, see Supplementary Table 6). The histological appearance in the duodenal mucosa was graded according to the Marsh score; Normal mucosa (Marsh score 0), increased number of intraepithelial lymphocytes (Marsh score 1), hyperplastic lesion and crypt hyperplasia (Marsh score 2) and various degree of villous atrophy (Marsh score 3A-C)<sup>17,18</sup>. Reference range anti-transglutaminase 2 IgA antibodies (Anti-TG2) <3U/mL, anti-deamidated gliadin peptide IgG antibodies (ant-DGP) < 20 Units/mL. Analyzed material: Peripheral blood mononuclear cells (PBMC), single-cell suspension (SCS) from duodenal biopsies.

**Supplementary Table 4. Mass cytometry-derived fold change, P values with false discovery rate per marker.**

| UCeD tetramer pos vs neg CD4+ blood T cells |            |            |            |
|---------------------------------------------|------------|------------|------------|
| Variable                                    | Fold chang | P value    | FDR        |
| PD-1                                        | 3.37446489 | 6.2625E-06 | 0.00018161 |
| CD161                                       | 2.17292987 | 3.0457E-05 | 0.00044163 |
| CD39                                        | 3.66724386 | 4.7212E-05 | 0.00045638 |
| CD45RA                                      | -1.8726527 | 9.614E-05  | 0.00055962 |
| CXCR3                                       | 2.67875437 | 9.6486E-05 | 0.00055962 |
| CD25                                        | -2.0599651 | 0.0003219  | 0.00084863 |
| CD38                                        | 2.00321055 | 0.0002185  | 0.00084863 |
| CTLA-4                                      | 0.70632218 | 0.00022526 | 0.00084863 |
| HLA-DR                                      | 3.54694316 | 0.0002385  | 0.00084863 |
| ICOS                                        | 1.98031909 | 0.00029958 | 0.00084863 |
| Integrin-β7                                 | 3.35498746 | 0.00031919 | 0.00084863 |
| CD49d                                       | 1.52339882 | 0.00039355 | 0.00095108 |
| CXCR4                                       | -0.8217108 | 0.00054343 | 0.00121227 |
| CCR6                                        | 0.94168994 | 0.0008466  | 0.00165236 |
| CCR7                                        | -1.5620493 | 0.00085467 | 0.00165236 |
| CD28                                        | 1.03068158 | 0.00126272 | 0.00218587 |
| OX40                                        | 1.57652604 | 0.00128137 | 0.00218587 |
| CD62L                                       | -3.0189471 | 0.00169502 | 0.00273086 |
| CD73                                        | -1.5208278 | 0.00189519 | 0.00289265 |
| CXCR5                                       | 0.16313598 | 0.00250674 | 0.00363478 |
| CCR4                                        | 0.20448483 | 0.00312444 | 0.00431471 |
| CD127                                       | -1.4573202 | 0.0038376  | 0.00505865 |
| CD137                                       | 2.20559632 | 0.06803669 | 0.08578539 |
| CD85j                                       | -0.5616357 | 0.07339271 | 0.08868286 |
| CD27                                        | -0.9823509 | 0.11666971 | 0.13533686 |
| CCR5                                        | -0.6718246 | 0.16377833 | 0.18267583 |
| CD69                                        | -0.4542505 | 0.31769572 | 0.34122874 |
| KLRG1                                       | -0.543436  | 0.82730049 | 0.85684694 |
| CD57                                        | -2.4448589 | 0.97096702 | 0.97096702 |

| UCeD tetramer pos vs control CD4+ blood T cells |            |            |            |
|-------------------------------------------------|------------|------------|------------|
| Variable                                        | Fold chang | P value    | FDR        |
| PD-1                                            | 2.15156943 | 1.1733E-07 | 3.4026E-06 |
| CD161                                           | 1.67125133 | 6.7931E-06 | 0.00019021 |
| CD62L                                           | -1.538977  | 7.0713E-06 | 0.00019093 |
| CD39                                            | 2.83912916 | 1.7926E-05 | 0.00046607 |
| CCR6                                            | 0.72083885 | 2.1544E-05 | 0.0005386  |
| CXCR3                                           | 1.64067935 | 3.9765E-05 | 0.00095437 |
| CD25                                            | -0.9838858 | 6.2388E-05 | 0.00143493 |
| CD45RA                                          | -1.3467149 | 0.00012626 | 0.00277762 |
| HLA-DR                                          | 2.19361245 | 0.00013194 | 0.00277762 |
| CCR4                                            | 0.29149137 | 0.00017006 | 0.00340113 |
| CD73                                            | -0.7563181 | 0.00032984 | 0.00626701 |
| CXCR4                                           | -0.2944311 | 0.00070688 | 0.01272393 |
| CD38                                            | 0.99668453 | 0.00096018 | 0.01626858 |
| Integrin-β7                                     | 1.83268317 | 0.00095698 | 0.01626858 |
| CD49d                                           | 0.81238742 | 0.00153617 | 0.02304254 |
| ICOS                                            | 1.16189932 | 0.0016852  | 0.02359284 |
| CD127                                           | -0.2952447 | 0.00483982 | 0.0629177  |
| CD69                                            | -1.2463682 | 0.0063521  | 0.07622523 |
| CCR7                                            | -0.4932464 | 0.00819167 | 0.08676084 |
| CXCR5                                           | 0.50363021 | 0.00788735 | 0.08676084 |
| OX40                                            | 1.1529639  | 0.01037375 | 0.09336372 |
| CTLA-4                                          | 0.23881263 | 0.05660291 | 0.4528233  |
| CD85j                                           | -0.7565234 | 0.0690963  | 0.4836741  |
| CD137                                           | 0.82384276 | 0.08622295 | 0.51733769 |
| CCR5                                            | 0.18679908 | 0.27049022 | 1          |
| CD27                                            | -0.4337247 | 0.21267916 | 1          |
| CD28                                            | 0.09696722 | 0.46916725 | 1          |
| CD57                                            | -1.4186848 | 0.33503479 | 1          |
| KLRG1                                           | 0.23814081 | 0.82236883 | 1          |

| UCeD tetramer pos vs neg CD4+ gut T cells |            |            |            |
|-------------------------------------------|------------|------------|------------|
| Variable                                  | Fold chang | P value    | FDR        |
| CD161                                     | 0.97220416 | 0.00032835 | 0.00952204 |
| CXCR3                                     | 0.80636811 | 0.00108693 | 0.01208599 |
| HLA-DR                                    | 1.39450801 | 0.00125028 | 0.01208599 |
| CD39                                      | 1.39717471 | 0.00233828 | 0.01520002 |
| OX40                                      | 1.46577946 | 0.00268195 | 0.01520002 |
| PD-1                                      | 1.85744183 | 0.00314483 | 0.01520002 |
| CD38                                      | 1.06108479 | 0.00368047 | 0.01524766 |
| CCR4                                      | 0.68483148 | 0.0069221  | 0.02007409 |
| CXCR5                                     | 0.77724598 | 0.00662812 | 0.02007409 |
| ICOS                                      | 1.41940434 | 0.00618273 | 0.02007409 |
| CD49d                                     | 0.66196686 | 0.01584541 | 0.04177427 |
| CD127                                     | -2.1500238 | 0.01862315 | 0.04500594 |
| CCR6                                      | 0.2253228  | 0.02394554 | 0.05239352 |
| Integrin-β7                               | 0.35987293 | 0.02529342 | 0.05239352 |
| CD69                                      | 0.46978026 | 0.02812773 | 0.05438027 |
| CD85j                                     | 1.19527263 | 0.03840194 | 0.06960352 |
| CD28                                      | 0.40522775 | 0.07587382 | 0.1294318  |
| CTLA-4                                    | 0.38342996 | 0.13391463 | 0.21575135 |
| CD57                                      | -0.9246062 | 0.14609522 | 0.21576885 |

| UCeD tetramer pos vs control CD4+ gut T cells |            |            |            |
|-----------------------------------------------|------------|------------|------------|
| Variable                                      | Fold chang | P value    | FDR        |
| CD39                                          | 2.76037179 | 3.1303E-06 | 9.078E-05  |
| CD49d                                         | 0.04227848 | 1.1633E-05 | 0.00032572 |
| CCR4                                          | 1.17800479 | 0.00010815 | 0.00292013 |
| CD127                                         | -1.1591164 | 0.0001516  | 0.0039416  |
| ICOS                                          | 3.41784645 | 0.00031783 | 0.00794571 |
| OX40                                          | 2.03091136 | 0.00150522 | 0.0361252  |
| PD-1                                          | 2.07209776 | 0.00168659 | 0.03879168 |
| Integrin-β7                                   | 0.34402756 | 0.00268442 | 0.05905725 |
| HLA-DR                                        | 0.38887431 | 0.00339612 | 0.0713185  |
| CD161                                         | 0.85093757 | 0.00784807 | 0.15696138 |
| CD85j                                         | -0.3621977 | 0.01661189 | 0.315626   |
| CD38                                          | -0.8229729 | 0.03193237 | 0.57478262 |
| CCR7                                          | -0.1859834 | 0.036309   | 0.61725301 |
| CTLA-4                                        | 0.26910706 | 0.05595624 | 0.89529979 |
| CD137                                         | -0.2766683 | 0.06308645 | 0.93138189 |
| CD28                                          | 0.6410895  | 0.06209213 | 0.93138189 |
| CD62L                                         | -1.672258  | 0.07571616 | 0.98431007 |
| CCR5                                          | 0.02622354 | 0.75333356 | 1          |
| CCR6                                          | -0.1799132 | 0.28255317 | 1          |

|        |            |            |            |
|--------|------------|------------|------------|
| CXCR4  | -1.1292641 | 0.1488061  | 0.21576885 |
| CD25   | -0.4054953 | 0.18510135 | 0.25561614 |
| CD45RA | -0.6689098 | 0.23821767 | 0.3140142  |
| CD27   | -1.3612242 | 0.3278513  | 0.41337773 |
| CCR5   | -0.0952532 | 0.34324992 | 0.41476032 |
| CD73   | -1.3430901 | 0.50025216 | 0.5802925  |
| KLRG1  | -0.6835401 | 0.53751303 | 0.59953377 |
| CCR7   | -0.024925  | 0.67654213 | 0.70070434 |
| CD137  | -0.1678129 | 0.65930509 | 0.70070434 |
| CD62L  | -0.6591668 | 0.9103162  | 0.9103162  |

|        |            |            |   |
|--------|------------|------------|---|
| CD25   | 1.17686872 | 0.9910158  | 1 |
| CD27   | 0.71823074 | 0.95712371 | 1 |
| CD45RA | 0.64616154 | 0.24243876 | 1 |
| CD57   | -1.6656093 | 0.13109569 | 1 |
| CD69   | -0.1206862 | 0.54090404 | 1 |
| CD73   | -0.7077205 | 0.09137822 | 1 |
| CXCR3  | -0.62058   | 0.73659431 | 1 |
| CXCR4  | -0.5520921 | 0.21856755 | 1 |
| CXCR5  | 0.33254566 | 0.10640317 | 1 |
| KLRG1  | -0.9329318 | 0.46390184 | 1 |

**Supplementary Table 4. Fold change, P values with false discovery rate per marker.** Mass cytometry-derived fold change (> 1.5 highlighted) of indicated markers (visualized as heat map in Figure 1e (gut) and 2e (blood)). P values (< 0.05 highlighted) and false discovery rate (FDR) (<0.05 highlighted) are also shown. The fold change is calculated as the log<sub>2</sub> fold change of the grand mean of donor marker intensity for tetramer positive versus tetramer pre-enriched (blood, *n* = 7, upper left) or tetramer negative (gut, *n* = 6, lower left) CD4<sup>+</sup> T cells in untreated celiac disease (UCeD) patients. Fold change, P values and FDR are also shown for tetramer positive blood T cells in UCD patients versus CD4<sup>+</sup> blood T cells in controls (*n* = 10 controls, upper right) and for tetramer positive gut T cells of UCeD patients versus CD4<sup>+</sup> gut T cells of controls (*n* = 7 controls, lower right). P values and FDRs were calculated using an unpaired, two-tailed t-test and the Benjamini-Hochberg procedure, respectively.



**Supplementary Table 5. List of differentially expressed genes.** See separate excel-file.

**Supplementary Table 6. Participants (P) with autoimmune disorders, influenza and controls in Fig. 2h-i, Extended Data Fig. 8 and 10e-f**

| Participant | Category  | Sex | Disease                      | Organ involvement and other information                                                           | Elevated aut antibodies or relevant test         |
|-------------|-----------|-----|------------------------------|---------------------------------------------------------------------------------------------------|--------------------------------------------------|
| P60         | Untreated | F   | Systemic sclerosis           | Pulmonary arterial hypertension, digital ulcers, sclerodactily, oesophageal dysmotility           | ANA, anti-centromere, anti-Ro/SSA                |
| P61         | Untreated | F   | Systemic sclerosis           | Worsening skin thickening                                                                         | ANA, anti-Scl-70                                 |
| P62         | Untreated | F   | Systemic sclerosis           | Pulmonary fibrosis, Stable skin and lung disease                                                  | ANA, anti-RNA polymerase III                     |
| P63         | Untreated | F   | Systemic sclerosis           | Renaud syndrom, active digital ulcers, osteomyelitis                                              | ANA, anti-centromere, anti-Ro/SSA                |
| P64         | Untreated | F   | Systemic sclerosis           | Raynaud, interstitial lung disease, oesophageal dysmotility                                       | ANA                                              |
| P65         | Untreated | M   | Systemic sclerosis           | Raynaud sondrom, sclerodactily, subcutaneous calcinosis, oesophageal dysmotility                  | ANA, anti-centromere (CENP-B), anti-Ro/SSA       |
| P66         | Untreated | F   | Systemic sclerosis           | Raynaud, digital ulcers, oesophageal dysmotility                                                  | ANA, anti-centromere                             |
| P67         | Untreated | M   | Systemic sclerosis           | Raynaud, sclerodactily, renal crisis, Interstitial lung disease                                   | ANA, anti-RNA polymerase III                     |
| P68         | Untreated | F   | Systemic sclerosis           | Worsening skin thickening                                                                         | ANA, anti-Scl-70                                 |
| P69         | Untreated | F   | Systemic sclerosis           | Stable disease, sclerodactily<br>Stable disease<br>Sclerodactily<br>Stable disease, sclerodactily | ANA, Scl-70                                      |
| P70         | Untreated | F   | Systemic lupus erythematosus | Flare of malar rash, fatigue, arthralgia                                                          | ANA, anti-dsDNA, anti-RO, anti-U1-snRNP, anti-Sm |
| P71         | Untreated | F   | Systemic lupus erythematosus | Nephritis (LN III A/C), arthritis                                                                 | ANA, anti-dsDNA                                  |
| P72         | Untreated | F   | Systemic lupus erythematosus | Lupus nephritis, arthritis                                                                        | anti-Ro/SSA, anti-RNP, anti-Ku                   |
| P73         | Untreated | F   | Systemic lupus erythematosus | UV-sensitive rash, arthritis                                                                      | ANA, anti-dsDNA, anti-beta2-glycoprotein 1       |
| P74         | Untreated | F   | Systemic lupus erythematosus | In remission                                                                                      | ANA                                              |
| P75         | Untreated | F   | Systemic lupus erythematosus | Raynaud's disease, arthritis, telangiectasias<br>Arthritis                                        | ANA, anti-RNP                                    |

|      |           |         |                              |                                                                         |                                           |
|------|-----------|---------|------------------------------|-------------------------------------------------------------------------|-------------------------------------------|
| P76  | Untreated | F       | Systemic lupus erythematosus | Dry eyes and mouth, children with neonatal systemic lupus erythematosus | ANA, anti-dsDNA, anti-Ro/SSA, anti-La/SSB |
| P77  | Untreated | F       | Systemic lupus erythematosus | Sicca symptoms, skin flare                                              | ANA, anti-Ro/SSA, anti-La/SSB             |
| P78  | Untreated | F       | Systemic lupus erythematosus | Stalbe disease                                                          | ANA                                       |
| P79  | Untreated | F       | Systemic lupus erythematosus | New rash and headache                                                   | ANA, anti-Ro/SSA                          |
| P80  | Control   | Unknown | Unknown                      | Blood bank donor                                                        | Not determined                            |
| P81  | Control   | Unknown | Unknown                      | Blood bank donor                                                        | Not determined                            |
| P82  | Control   | Unknown | Unknown                      | Blood bank donor                                                        | Not determined                            |
| P83  | Control   | Unknown | Unknown                      | Blood bank donor                                                        | Not determined                            |
| P84  | Control   | Unknown | Unknown                      | Blood bank donor                                                        | Not determined                            |
| P85  | Control   | Unknown | Unknown                      | Blood bank donor                                                        | Not determined                            |
| P86  | Control   | Unknown | Unknown                      | Blood bank donor                                                        | Not determined                            |
| P87  | Control   | Unknown | Unknown                      | Blood bank donor                                                        | Not determined                            |
| P88  | Control   | Unknown | Unknown                      | Blood bank donor                                                        | Not determined                            |
| P89  | Control   | Unknown | Unknown                      | Blood bank donor                                                        | Not determined                            |
| P90  | Control   | Unknown | Unknown                      | Blood bank donor                                                        | Not determined                            |
| P91  | Control   | Unknown | Unknown                      | Blood bank donor                                                        | Not determined                            |
| P92  | Control   | Unknown | Unknown                      | Blood bank donor                                                        | Not determined                            |
| P93  | Control   | Unknown | Unknown                      | Blood bank donor                                                        | Not determined                            |
| P94  | Control   | Unknown | Unknown                      | Blood bank donor                                                        | Not determined                            |
| P95  | Control   | Unknown | Unknown                      | Blood bank donor                                                        | Not determined                            |
| P96  | Control   | Unknown | Unknown                      | Blood bank donor                                                        | Not determined                            |
| P97  | Control   | Unknown | Unknown                      | Blood bank donor                                                        | Not determined                            |
| P98  | Untreated | M       | Influenza                    | Fever, cough, soar throat, runny nose, myalgia                          | NP Swab: Influenza A <sup>+</sup>         |
|      |           |         | Recovery, 41 days            | No influenza-related symptoms                                           | Not determined                            |
| P99  | Untreated | F       | Influenza                    | Fever, cough, soar throat, runny nose, myalgia                          | NP Swab: Influenza A <sup>+</sup>         |
| P100 | Untreated | F       | Influenza                    | Fever, cough, soar throat, runny nose, myalgia                          | NP Swab: Influenza A <sup>+</sup>         |
|      |           |         | Recovery, 27 days            | No influenza-related symptoms                                           | Not determined                            |
| P101 | Untreated | F       | Influenza                    | Fever, cough, soar throat, runny nose, myalgia                          | NP Swab: Influenza A <sup>+</sup>         |
|      |           |         | Recovery, 23 days            | No influenza-related symptoms                                           | Not determined                            |
| P102 | Untreated | F       | Influenza                    | Fever, cough, soar throat, runny nose, myalgia                          | NP Swab: Influenza A <sup>+</sup>         |

|      |           |   |                   |                                                |                                   |
|------|-----------|---|-------------------|------------------------------------------------|-----------------------------------|
|      |           |   | Recovery, 30 days | No influenza-related symptoms                  | Not determined                    |
| P103 | Untreated | F | Influenza         | Fever, cough, soar throat, runny nose, myalgia | NP Swab: Influenza A <sup>+</sup> |
|      |           |   | Recovery, 30 days | No influenza-related symptoms                  | Not determined                    |
| P104 | Untreated | M | Influenza         | Fever, cough, soar throat, runny nose, myalgia | NP Swab: Influenza A <sup>+</sup> |
|      |           |   | Recovery, 28 days | No influenza-related symptoms                  | Not determined                    |

**Supplementary Table 6. Participants (P) with autoimmune disorders, influenza and controls in Fig. 2h-i, Extended Data Fig. 8 and 10e-f.** For participants (P) with autoimmune disorders, autoantibodies that were measured above the upper limit of normal at the time-point of blood draw for this study are listed. For participants included before and after influenza infection, positive nasopharyngeal (NP) swab test results for influenza A virus is indicated. The patients are listed as untreated as none of them were treated with steroids or other immunomodulating drugs at the time point of blood draw. However, P99, P100, P101, P103 and P104 were treated with the antiviral drug Oseltamivir between the first and second consultation.

**Supplementary Table 7. Mass cytometry antibody panel for autoimmune disorders.**

| Label       | Target            | Clone    | Supplier          | Concentration |
|-------------|-------------------|----------|-------------------|---------------|
| 89Y         | CD45              | HI30     | Fluidigm          | 2:100         |
| 108Pd       | CD45              | HI30     | Biologend         | 8 µg/ml       |
| 115In       | CD57**            | HCD57    | Biologend         | 1.5 µg/ml     |
| 139La       | CD28**            | CD28.2   | Biologend         | 4 µg/ml       |
| 141Pr       | Intebrin-α4/CD49d | 9F10     | Fluidigm          | 1:100         |
| 142Nd       | KLRG1**           | 13F12F2  | Thermo Fischer S. | 3 µg/ml       |
| 143Nd       | CD278/ICOS**      | C398.4A  | Fluidigm          | 0.5:100       |
| 144Nd       | CD38**            | HIT2     | Fluidigm          | 1.5:100       |
| 145Nd       | CD4               | RPA-T4   | Fluidigm          | 0.5:100       |
| 146Nd       | CD8a              | RPA-T8   | Fluidigm          | 0.6:100       |
| 147Sm       | TIGIT             | 372702   | Biologend         | 8 µg/ml       |
| 148Nd       | CD27**            | O323     | Biologend         | 1 µg/ml       |
| 149Sm       | CD56 (NCAM)       | NCAM16.2 | Fluidigm          | 0.5:100       |
| 150Nd       | CD127**           | A019D5   | Biologend         | 1 µg/ml       |
| 151Eu       | CD11c             | Bu15     | Biologend         | 2 µg/ml       |
| 151Eu       | CD19              | HIB19    | Biologend         | 1 µg/ml       |
| 151Eu       | CD14              | M5E2     | Fluidigm          | 1:100         |
| 152Sm       | TCRg/d            | 11F2     | Fluidigm          | 1:100         |
| 153Eu       | CD62L**           | DREG-56  | Fluidigm          | 0.5:100       |
| 154Sm       | CD3               | UCHT1    | Fluidigm          | 0.8:100       |
| 155Gd       | CD279 (PD-1)**    | EH12.2H7 | Fluidigm          | 1.8:100       |
| 156Gd       | CD29              | TS2/16   | Biologend         | 1.6 µg/ml     |
| 158Gd       | CD194 (CCR4)**    | L291H4   | Fluidigm          | 0.5:100       |
| 159Tb       | CD161**           | HP-3G10  | Fluidigm          | 0.5:100       |
| 160Gd       | CD39**            | A1       | Fluidigm          | 1:100         |
| 161Dy       | CD152 (CTLA-4)**  | 14D3     | Fluidigm          | 5:100         |
| 162Dy       | Integrin-β7       | FIB504   | Fluidigm          | 0.5:100       |
| 163Dy       | CD183 (CXCR3)**   | G025H7   | Fluidigm          | 0.75:100      |
| 164Dy       | CD200             | OX-104   | Biologend         | 8 µg/ml       |
| 165Ho       | CD103             | B-Ly7    | Thermo Fischer S. | 0.5:100       |
| 166Er       | CCR2              | K036C2   | Biologend         | 2 µg/ml       |
| 167Er       | CD197 (CCR7)**    | G043H7   | Fluidigm          | 1:100         |
| 168Er       | CD73**            | AD2      | Fluidigm          | 1:100         |
| 169Tm       | CD25 (IL-2R)**    | 2A3      | Fluidigm          | 0.6:100       |
| 170Er       | CD45RA**          | HI100    | Fluidigm          | 0.1:100       |
| 171Yb       | CD185 (CXCR5)**   | RF8B2    | Fluidigm          | 0.75:100      |
| 172Yb       | CD69**            | FN50     | Biologend         | 1 µg/ml       |
| 173Yb       | HLA-DR**          | L243     | Fluidigm          | 0.75:100      |
| 174Yb       | CD196 (CCR6)**    | G034E3   | Biologend         | 1 µg/ml       |
| 175Lu       | CX3CR1            | 2A9-1    | Biologend         | 6 µg/ml       |
| 176Yb       | TCRα/β            | IP26     | Fluidigm          | 1.5:100       |
| 191Ir/193Ir | Nucleated cells   |          | Fluidigm          | 1:1000        |
| 195Pt       | Dead cells        |          | Fluidigm          | 1:1500        |
| 209Bi       | CD11b             | ICRF44   | Fluidigm          | 0.4:100       |

**Supplementary Table 7. Mass cytometry antibody panel for autoimmune disorders.**

Antibody panel for mass cytometry staining of peripheral blood from participants with autoimmune disease, participants during and after influenza infection and control subjects (Figure 2h-i and Extended Data Fig. 8). Two asterisks identify the markers used to generate Fig. 2i (22 CD4<sup>+</sup> T-cell markers common to mass cytometry staining panel in Supplementary table 1). Final concentrations are stated in µg/ml when using self-conjugated antibodies or per volume 100 when the concentration was not available from the manufacturer.

**Supplementary Table 8. Antibodies used in flow cytometry experiments.**

| Label              | Target      | Clone   | Supplier          | Concentration |
|--------------------|-------------|---------|-------------------|---------------|
| APC                | FoxP3       | PCH101  | Thermo Fischer S. | 5 µg/ml       |
| Alexa 700          | CD4         | A161A1  | Biolegend         | 3:100         |
| APC-Cy7            | CD25        | BC96    | Biolegend         | 4:100         |
| PE-Cy5             | CD45RA      | HI100   | Biolegend         | 1:100         |
| PE-Cy7             | CD127       | A019D5  | Biolegend         | 5:100         |
| Alexa 488          | Ki-67       | Ki-67   | Biolegend         | 5 µg/ml       |
| Pacific Blue       | CD11c       | 3.9     | Biolegend         | 1.5:100       |
| Pacific Blue       | CD56        | 5.1H11  | Biolegend         | 1.5:101       |
| Pacific Blue       | CD14        | HCD14   | Biolegend         | 1.5:102       |
| Pacific Blue       | CD19        | 6D5     | Biolegend         | 1.5:103       |
| Aqua/510           | Dead cells  |         | Biolegend         | 1:100         |
| BV605              | CD3         | UCHT1   | Biolegend         | 4:100         |
| BV650              | Integrin β7 | FIB504  | BD Bisciences     | 5:100         |
| Alexa 488          | CD278/ICOS  | C398.4A | Biolegend         | 1 µg/ml       |
| PerCP              | CD62L       | DREG-56 | Biolegend         | 3:100         |
| Pe-Cy7             | CD45RA      | HI100   | Thermo Fischer S. | 2.5:100       |
| APC                | CXCR4       | 12G5    | Biolegend         | 1:100         |
| APC                | CXCR5       | J252D4  | Biolegend         | 1:100         |
| APC-H7             | CD4         | SK3     | BD Bisciences     | 0.36 µg/ml    |
| Fixable Violet/405 | Dead cells  |         | Thermo Fischer S. | 1:100         |
| BV605              | CD3         | OKT3    | Biolegend         | 3:100         |
| Alexa 488          | CD25        | 14101   | Thermo Fischer S. | 4:100         |

**Supplementary Table 8. Antibodies used in flow cytometry experiments.** Antibodies used for flow cytometry staining. Final concentrations are stated in µg/ml when information available or per volume 100 when the concentration was not available from the manufacturer.
